# Supplementary material
Source: Springer Nature journal article supplement (https://www.springermedizin.de/resource/supplementary/13048_2013_198_MOESM2_ESM.pdf/9665114)
Supplement: MOESM2 [file 9665114]

Elderly (>40 yrs old), low responder and those achieving <20 oocytes in their previous IVF attempt

Individually tailored COH protocol

OPU  $\geq$  20 oocytes and or  $\geq$  10 embryos

OPU < 20 oocytes and or  $\leq$  10 embryos

If HCG triggered

If GnRH-ag triggered, follow Fig.1

Patient is instructed to start oral carbegoline 0.5 mg a day for 8 days, and is followed for 5 days post OPU

Embryo transfer on day 2/3

Signs of early OHSS

No signs of early OHSS

Cryopreserve all embryos

In patients  $\leq$  35 yrs old in one of their first 2 attempts, transfer 1 blastocyst. Otherwise, transfer 2 blastocysts

No pregnancy
